# Supplementary material for: Cobalt and copper phosphinates based on N-(phosphinomethyl)iminodiacetic acid: supramolecular layered structures and magnetic properties
Source: Royal Society of Chemistry journal article supplement (doi:10.1039/c2ce00026a), 2012-01-01
Supplement: c2ce00026a.pdf [file c2ce00026a.pdf]

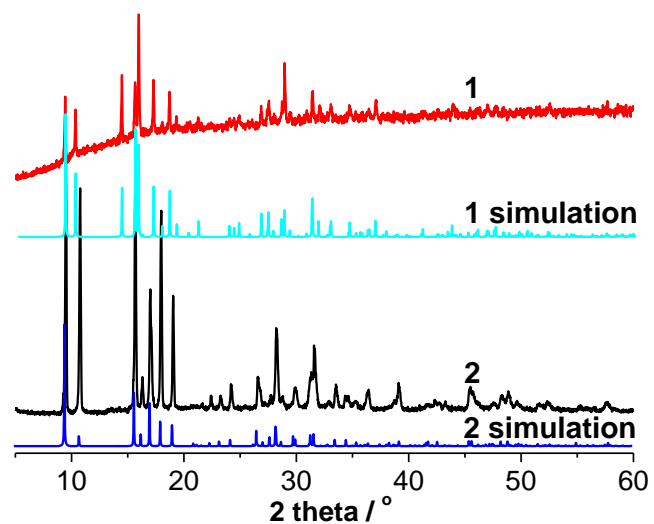

**Fig. S1** XRD patterns for compounds **1** and **2**.

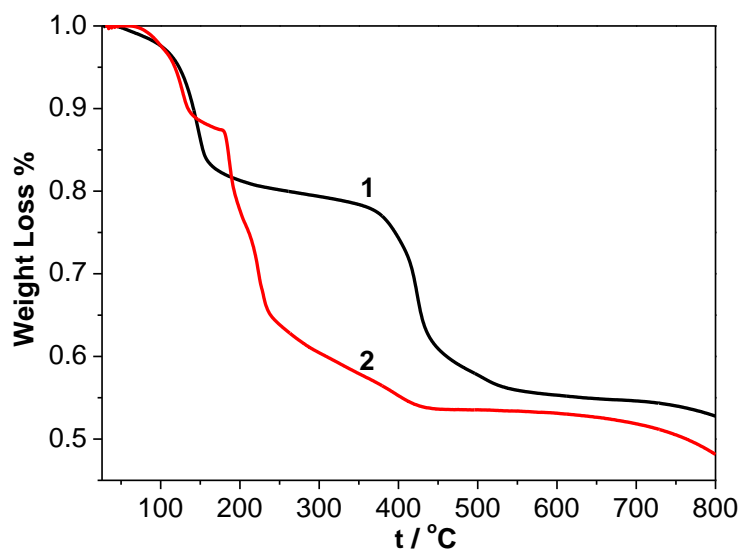

**Fig. S2** TG curves for compounds **1** and **2**.

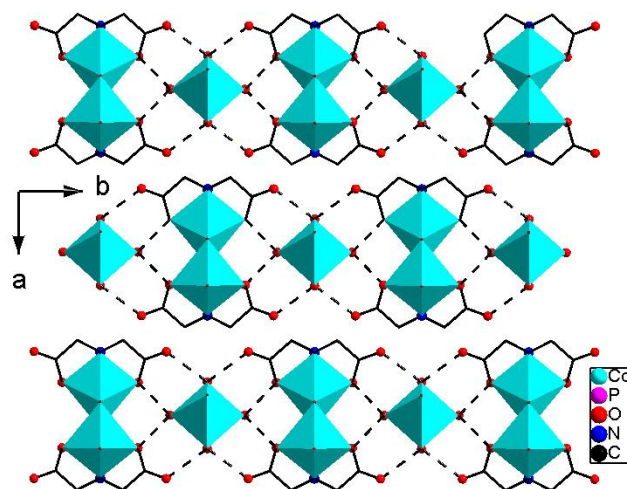

**Fig. S3** Packing diagram of structure **1** along the  $c$ -axis.

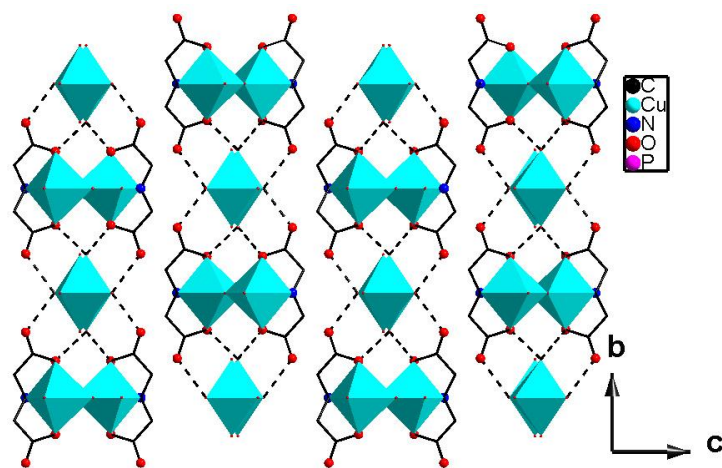

**Fig. S4** Packing diagram of structure **2** along the *a*-axis.

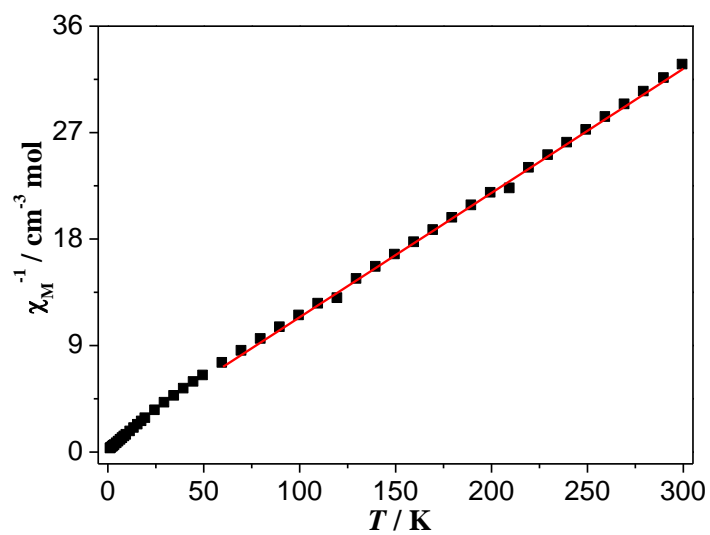

**Fig. S5** The  $\chi_M^{-1}$  versus  $T$  plot for **1**.

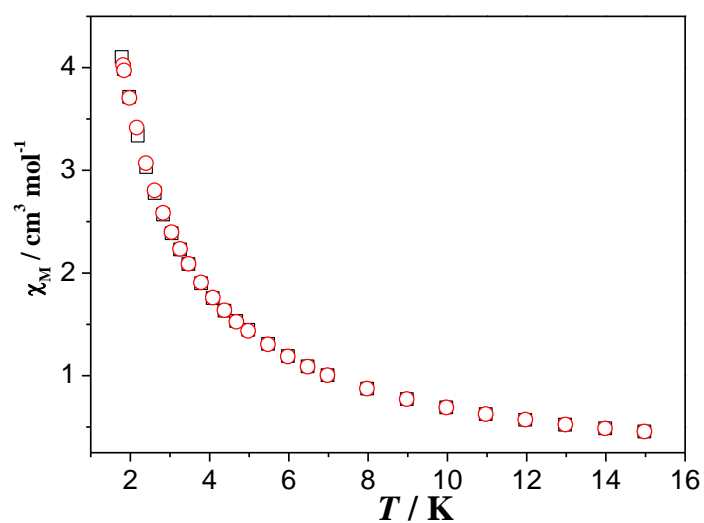

**Fig. S6** The ZFCM (O) and FCM ( $\square$ ) curves for **1**.

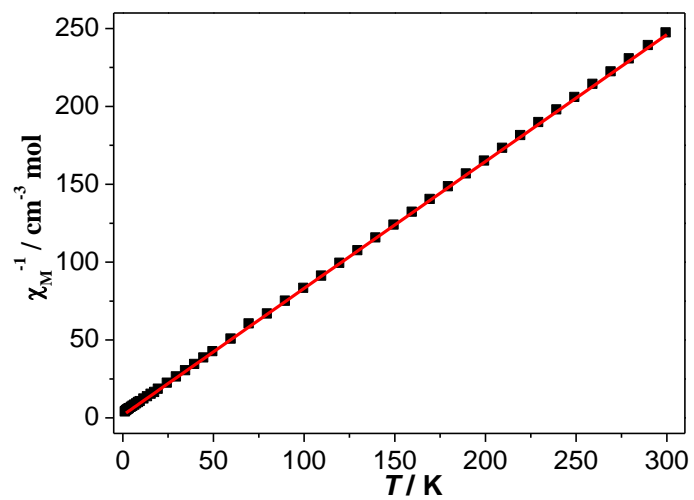

**Fig. S7** The  $\chi_M^{-1}$  versus  $T$  plot for **2**.
